# Supplementary material for: Self-Patterned Stretchable Electrode Based on Silver Nanowire Bundle Mesh Developed by Liquid Bridge Evaporation
Source: MDPI journal article supplement (doi:10.3390/nano11112865), 2021-10-27
Supplement: s1 [file s1]

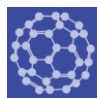

## Supplementary Materials

# Self-Patterned Stretchable Electrode Based on Silver Nanowire Bundle Mesh developed by Liquid Bridge Evaporation

Eun Young An <sup>1,2,†</sup>, Siyoung Lee <sup>3,†</sup>, Seung Goo Lee <sup>4</sup>, Eunho Lee <sup>5</sup>, Jeong Ju Baek <sup>1</sup>, Gyojic Shin <sup>1</sup>, Kyung Ho Choi <sup>1</sup>, Jeong Ho Cho <sup>2,\*</sup> and Geun Yeol Bae <sup>1,\*</sup>

<sup>1</sup> Green and Sustainable Materials R&D Department, Korea Institute of Industrial Technology, Cheonan 31056, Korea; dksdmsdud97@kitech.re.kr (E.Y.A.); baekjj@kitech.re.kr (J.J.B.); gyshin@kitech.re.kr (G.S.); khchoi@kitech.re.kr (K.H.C.)

<sup>2</sup> Department of Chemical and Biomolecular Engineering, Yonsei University, Seoul 03722, Korea

<sup>3</sup> Department of Chemical Engineering, Pohang University of Science and Technology, Pohang 37673, Korea; challenge@postech.ac.kr

<sup>4</sup> Department of Chemistry, University of Ulsan, Ulsan 44610, Korea; lees9@ulsan.ac.kr

<sup>5</sup> Department of Chemical Engineering, Kumoh National Institute of Technology, Gumi 39177, Korea; leehh@kumoh.ac.kr

\* Correspondence: jhcho94@yonsei.ac.kr (J.H.C.); gybae@kitech.re.kr (G.Y.B.)

† These authors contributed equally to this work.

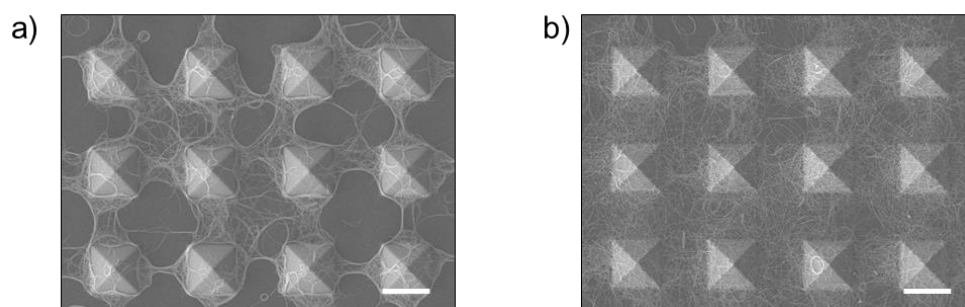

**Figure S1.** FE-SEM Images of surface-treated PDMS substrate by UVO. Scale bar: 10  $\mu\text{m}$ ; (a) for 10 min; (b) for 60 min.

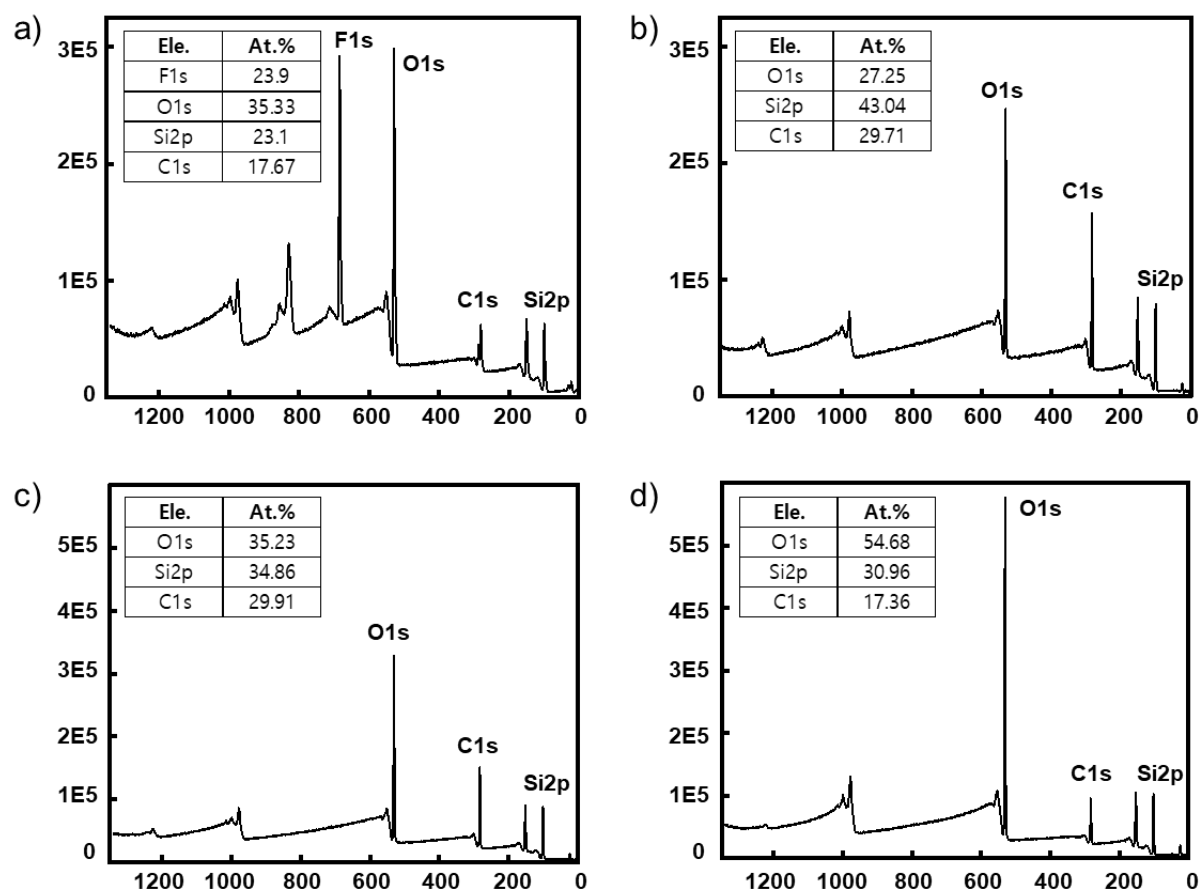

**Figure S2.** XPS Data of the surface treated-PDMS substrates; (a) FOTS-treated; (b) Pristine; (c) UVO treated for 10 min; (d) UVO treated for 60 min.

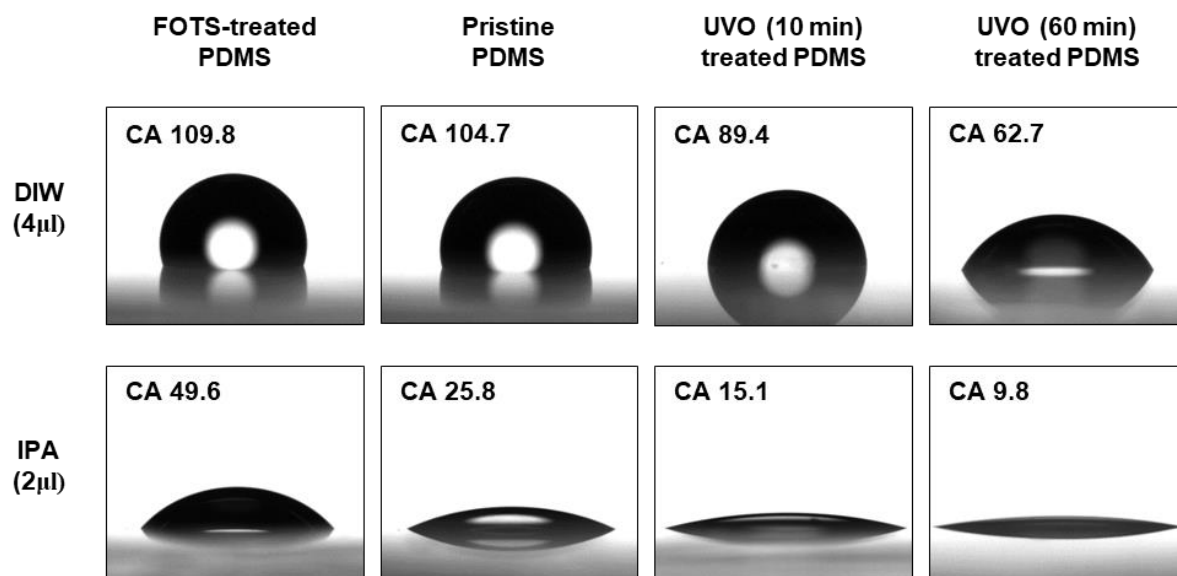

**Figure S3.** Images and contact angles of static droplets on pristine and surface treated PDMS substrate. The substrates are flat, not microstructured.

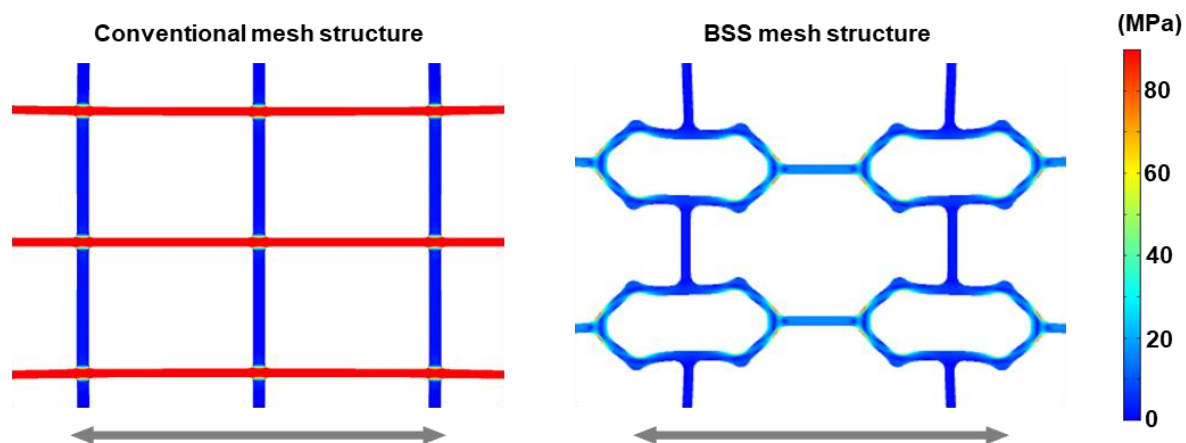

**Figure S4.** FEM Simulation results of the stress distribution of conventional mesh structure and the BSS mesh structure under 30% strain. The simulation was carried out under the assumption that there is only a mesh structure without a substrate.

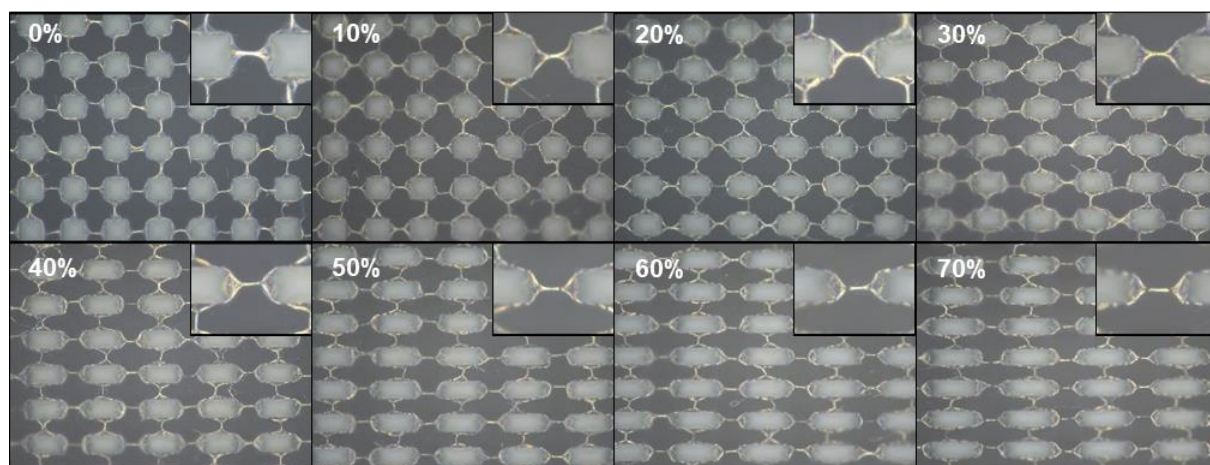

**Figure S5.** Optical microscopy images of the stretchable electrode stretched up to 70% tensile strain.

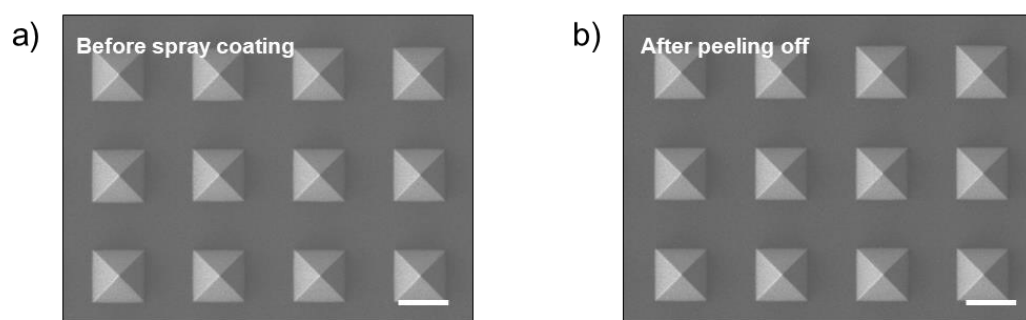

**Figure S6.** (a, b) FE-SEM Images of microstructured PDMS substrates before spray coating and after peeling off the stretchable electrode, respectively.
